# Supplementary material for: The pH dependency of the boron isotopic composition of diatom opal ( Thalassiosira weissflogii )
Source: Copernicus journal article supplement (doi:10.5194/bg-2019-180), 2019-05-23
Supplement: Supplementary file 1 [file bg-2019-180-supplement.pdf]

## Supplement

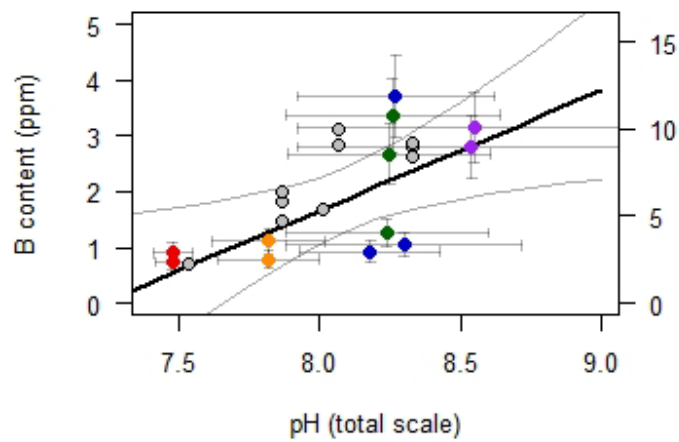

**Supplement Figure S1:** Boron content of cultured *T. weissflogii* diatom opal as a function of pH labelled according to  $p\text{CO}_2$ . A least squares regression with 95% confidence interval is also shown through the data belonging to this study. In grey (and using the right-hand y-axis) are the data for *T. weissflogii* from Mejia et al. 2013. Note how both studies show an increase in boron content with increasing pH, but the absolute values are offset by a factor of 2-3.
